# Supplementary material
Source: PubMed Central journal article supplement (PMC3850755)

**A**kb

8.

6.

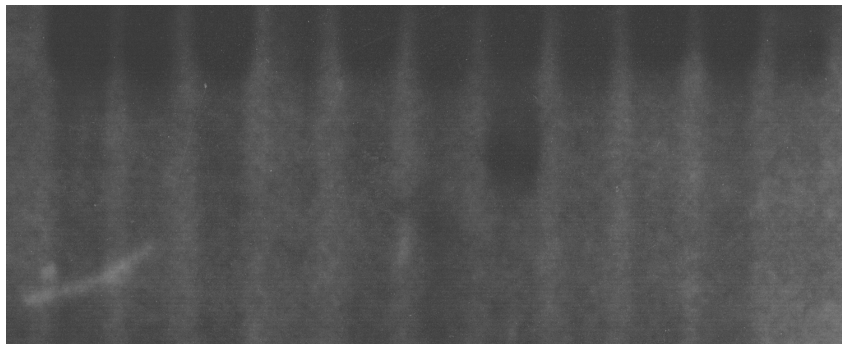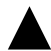**B**Mouse PKM2 Genotype

+/+

+/fl

fl/fl

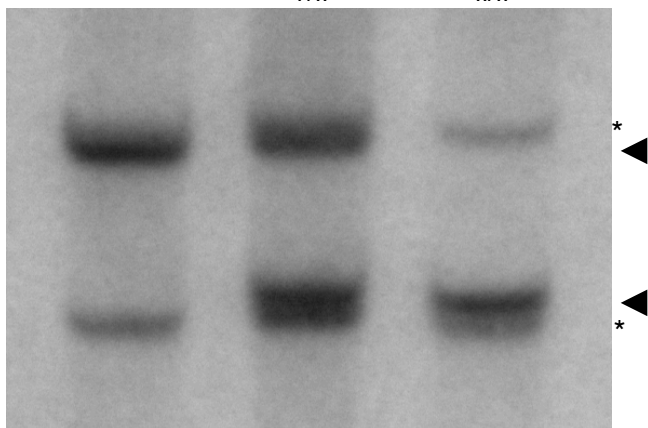**C**Mouse PKM2 Genotypekb

Marker

+/+

+/fl

fl/fl

10

8

6

5

4

3

2

1.5

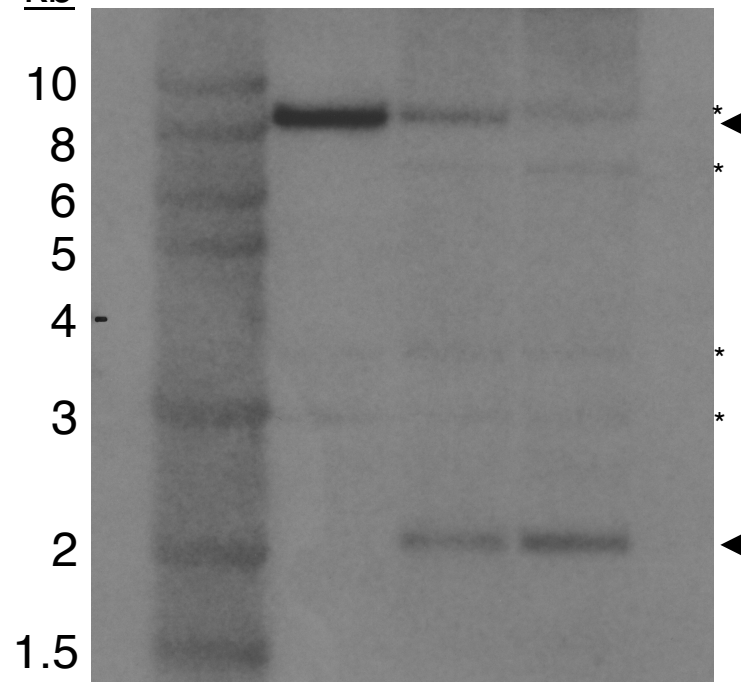

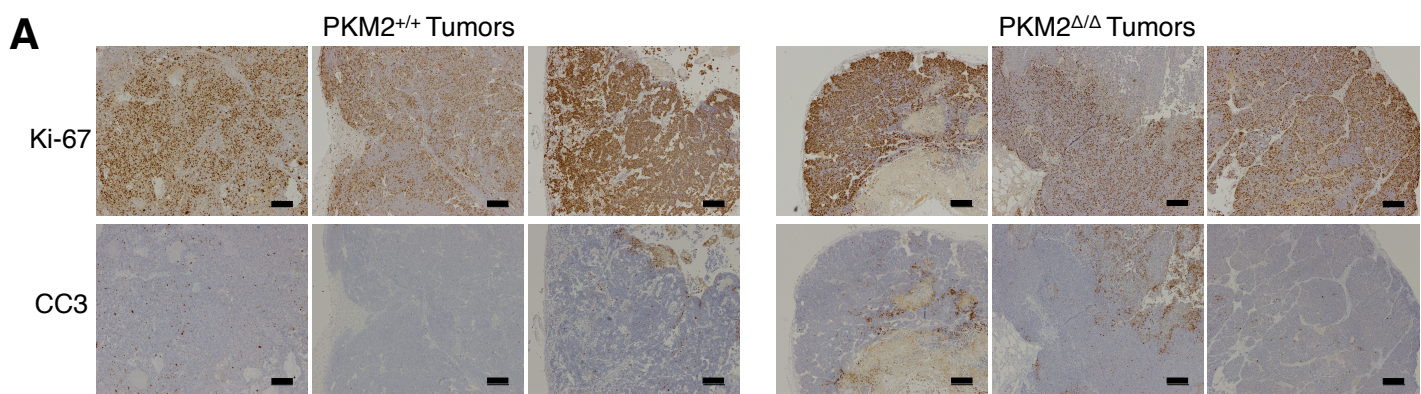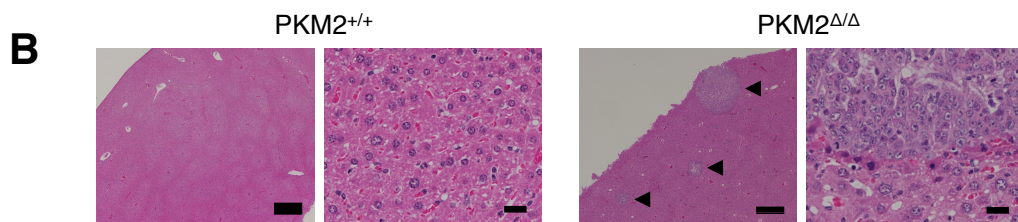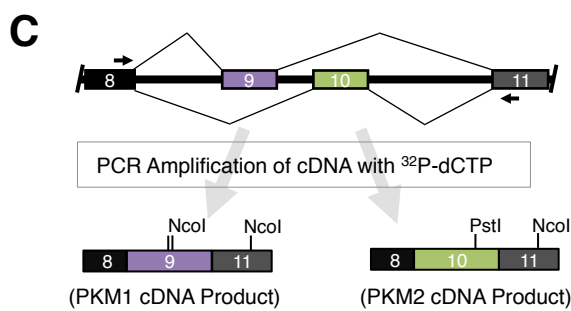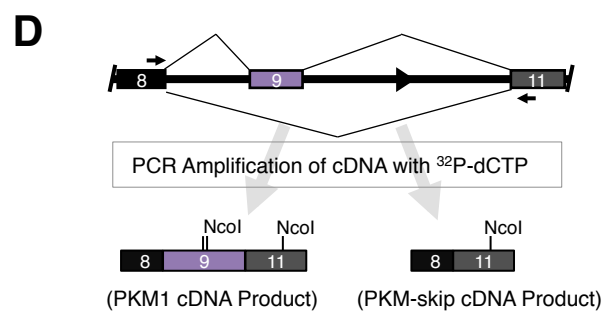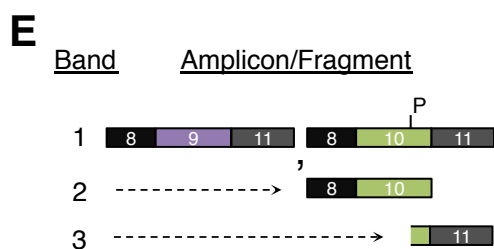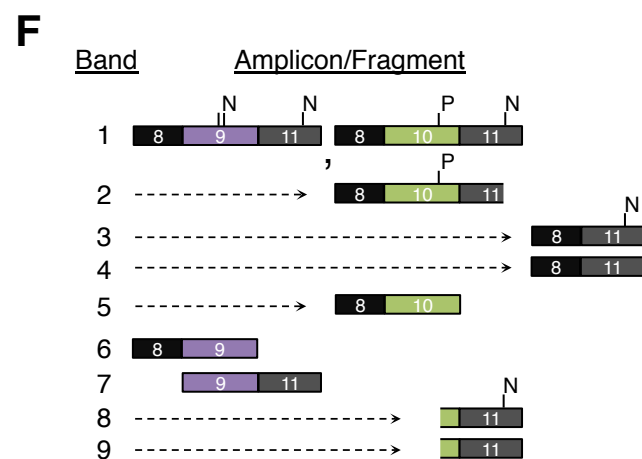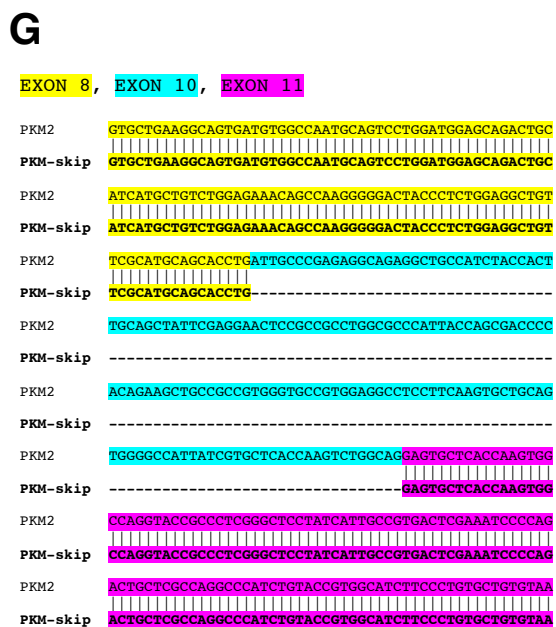

PKM-skip mRNA

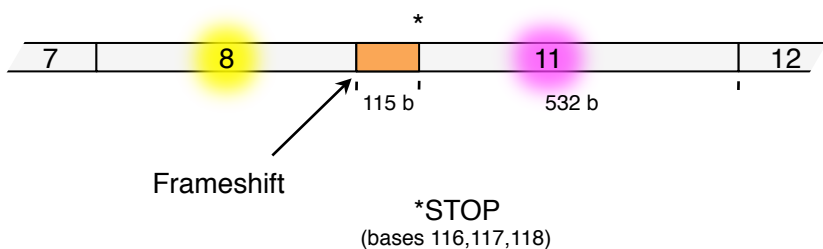



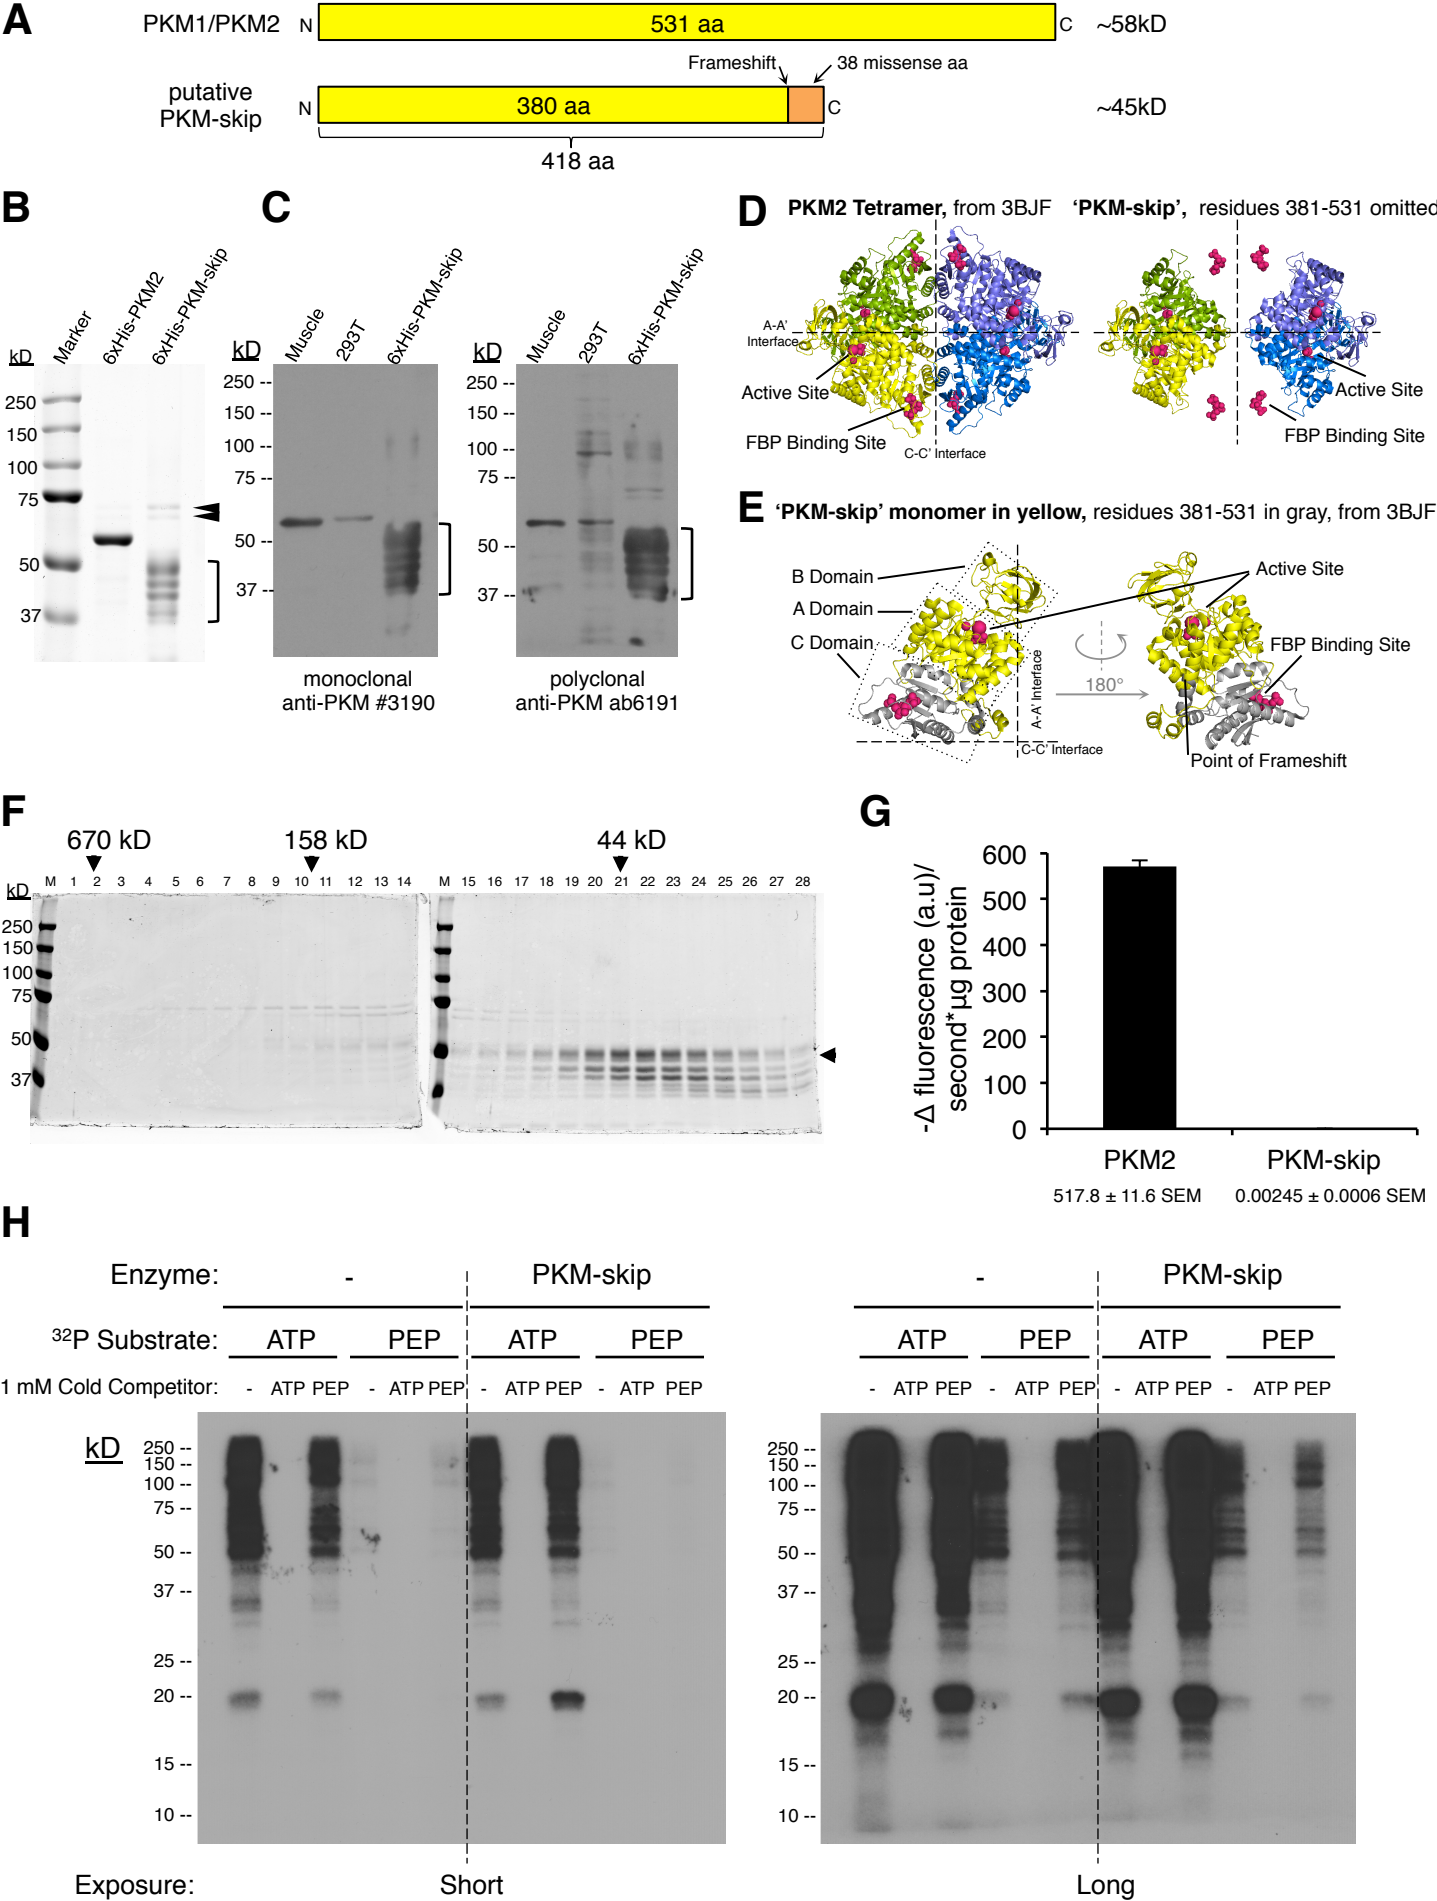

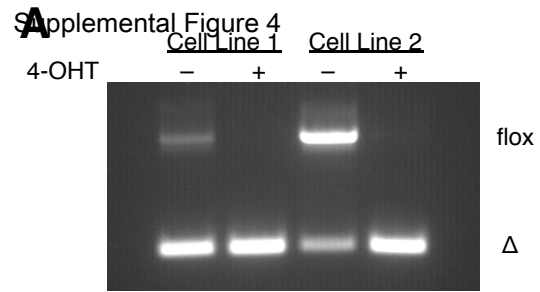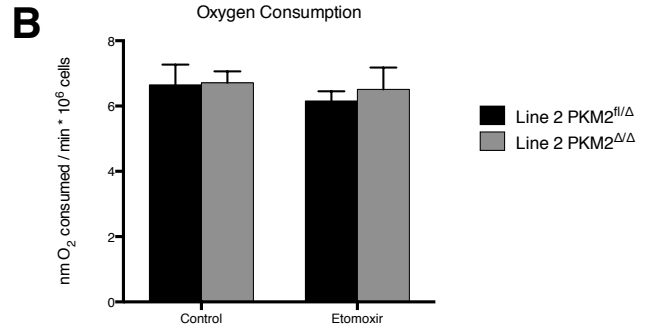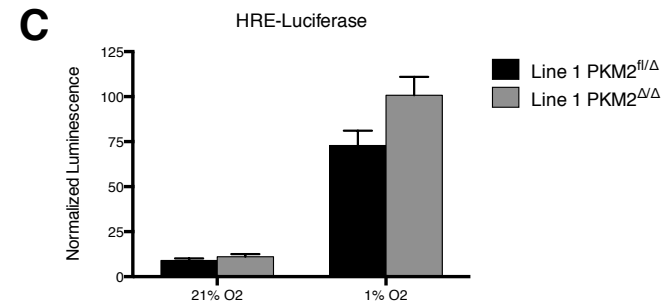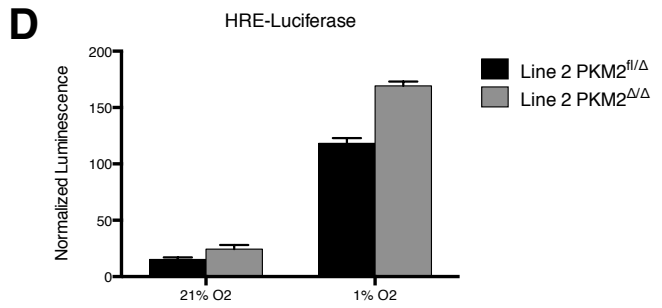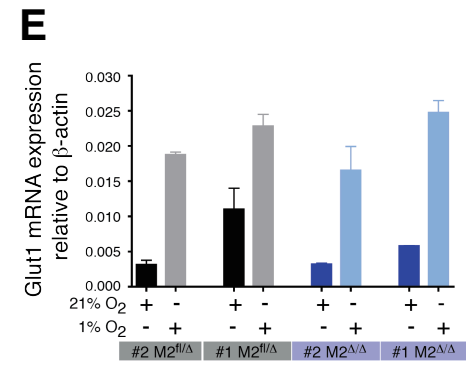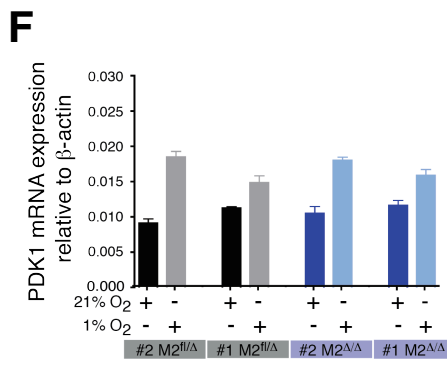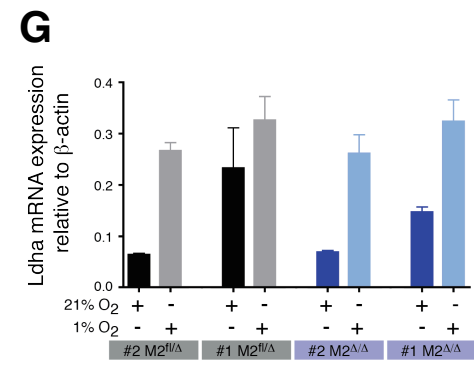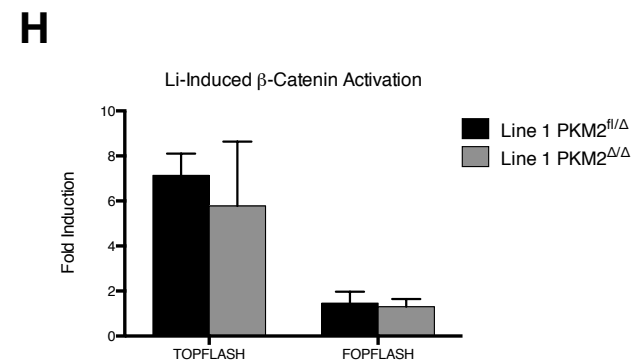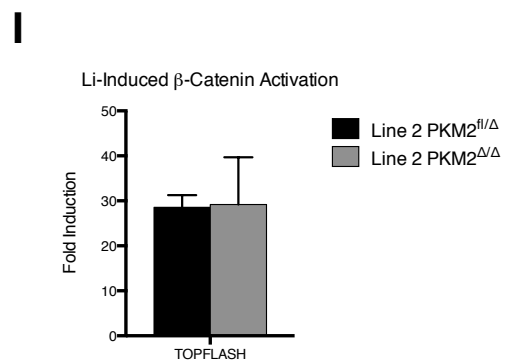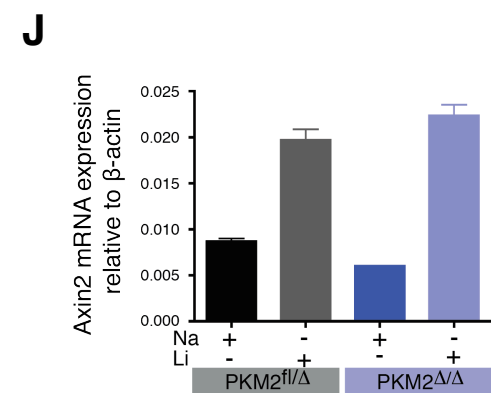

|           | PCNA+ | PCNA- |
|-----------|-------|-------|
| High PKM1 | 195   | 818   |
| Low PKM1  | 419   | 965   |

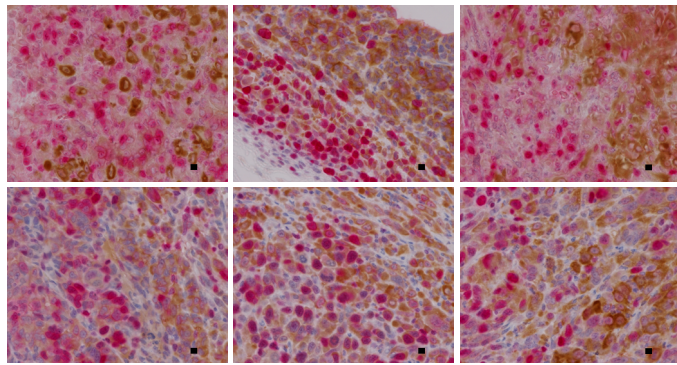

|           | PCNA+ | PCNA- |
|-----------|-------|-------|
| High PKM1 | 166   | 1186  |
| Low PKM1  | 946   | 3007  |

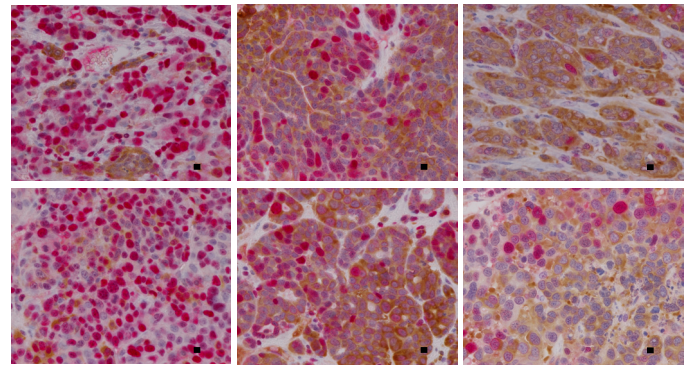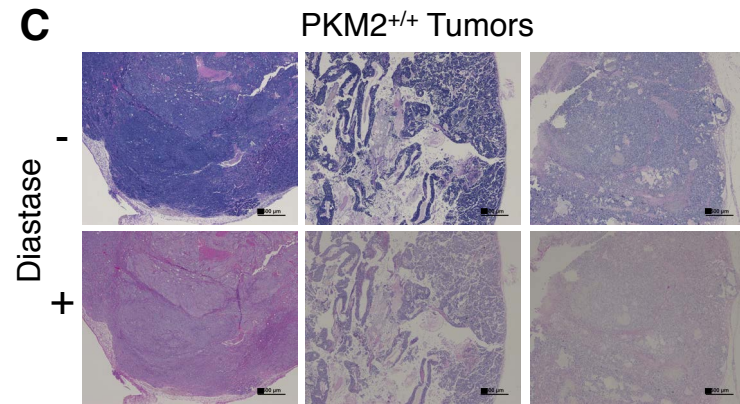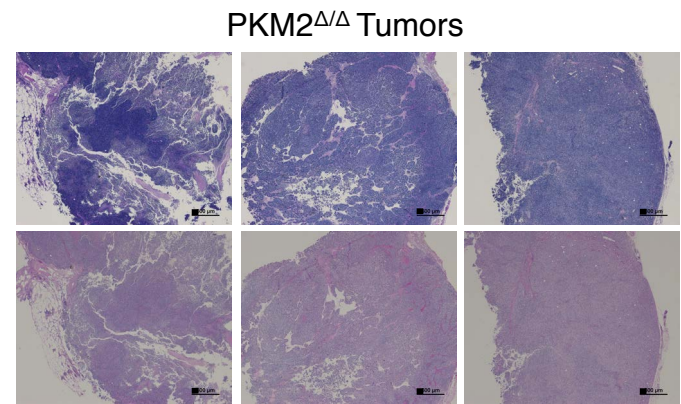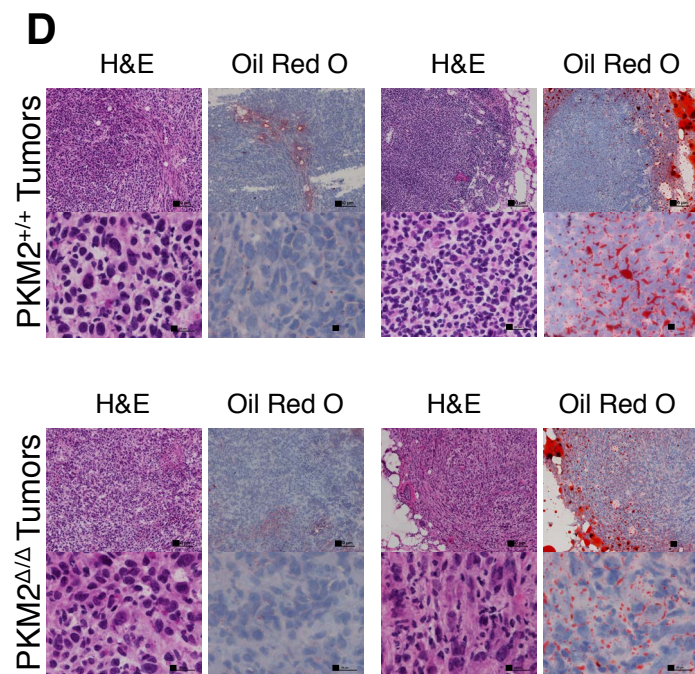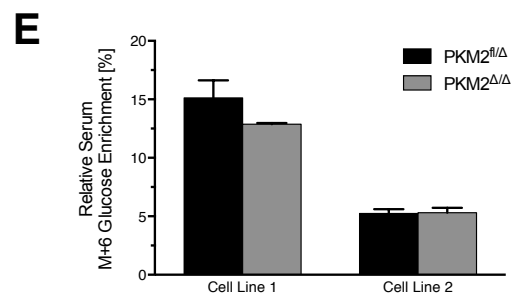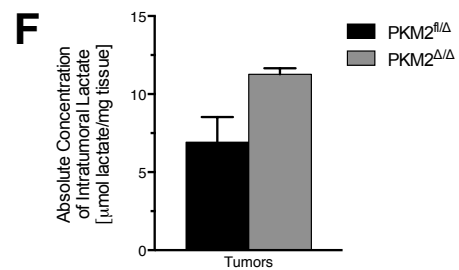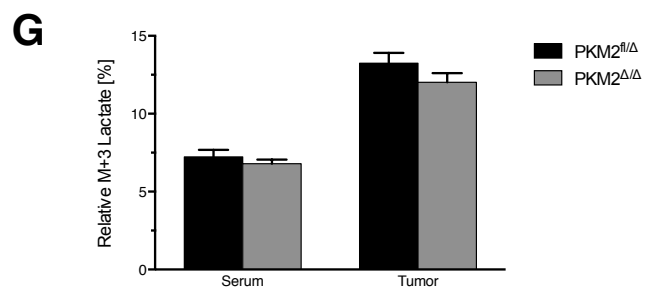

Supplement: NIHMS526667-supplement-02.pdf [file NIHMS526667-supplement-02.pdf]
